# Supplementary material for: The surface tension and CCN activation of sea spray aerosol particles
Source: Copernicus journal article supplement (doi:10.5194/egusphere-2024-2838), 2024-09-18
Supplement: Supplementary file 1 [file egusphere-2024-2838-supplement.pdf]

## Contents

|     |                                                                     |    |
|-----|---------------------------------------------------------------------|----|
| S1  | Influence of the Sigmoid parameter $d$                              | 2  |
| S2  | Computational flowchart for the quaternary Eberhart–Monolayer model | 3  |
| S3  | Influence of solution non-ideality                                  | 4  |
| S4  | Eberhart fit parameters of organic substances                       | 7  |
| S5  | Surface tension isotherms of atmospheric samples                    | 9  |
| S6  | Surface tension isotherms of the model compounds                    | 11 |
| S7  | Influence of salting-out                                            | 12 |
| S8  | Köhler curves of additional systems                                 | 13 |
| S9  | Variation of the surfactant                                         | 16 |
| S10 | Influence of organic fraction on the critical activation diameter   | 18 |

## S1 Influence of the Sigmoid parameter $d$

To test the influence of the parameter  $d$  on the critical supersaturation we calculated Köhler curves with Eq. 1. We assumed the particle to consist entirely of an organic (surface-active) substance, i.e., it contains no inorganic co-solute. We further assumed solution ideality, i.e.,  $a_w = x_w$ , where  $x_w$  is the mole fraction of water and the organic substance is assumed not to dissociate. The surface tension  $\sigma$  in the Kelvin equation (exponential function in Eq. 1) is calculated as a function of the total composition of the particle using the Sigmoid model (Eq. 2). As such, no bulk depletion is considered. The temperature is set to  $T = 25^\circ\text{C}$  and the molar volume of water to  $v_i N_A = 18.05 \text{ cm}^3 \text{ mol}^{-1}$ . In Fig. S1, the results are shown for three different substances, i.e., propionic acid, SDS, and oleic acid, which are covering a broad range of  $p$  values. The values for  $p$ ,  $\sigma_i$ , and  $v_i N_A$  which were used for each substance are annotated in the respective panel. The curves with  $d = 1$  are highlighted by a thicker, black line because the Eberhart model is a simplified version of the Sigmoid model with  $d = 1$ .

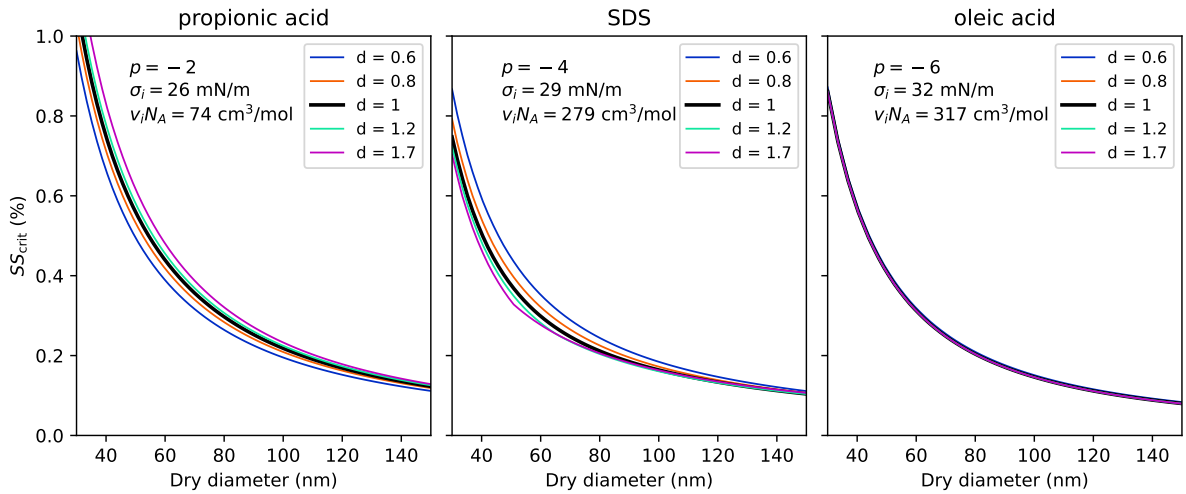

Figure S1: Influence of the Sigmoid model's parameter  $d$ : Critical supersaturation as a function of the dry diameter for three different substances and 5 different values for  $d$ .

It can be seen that the curves for the various  $d$  values are close to each other and in the case of oleic acid overlap entirely. The strongest influence of  $d$  on  $SS_{\text{crit}}$  is observed for the case with SDS. According to the fits with the Sigmoid model in El Haber et al. (2024),  $d = 1.65$  for SDS and small dry diameters. For dry diameters between 30 nm and 60 nm, assuming  $d = 1$  leads to an error in  $\Delta SS_{\text{crit}}$  of  $\approx 0.05\%$ . This error can be regarded as the maximum overall error, since here we assumed particles consisting entirely of the surfactant and bulk depletion is not considered, both of which enhance the surface tension lowering effect on  $SS_{\text{crit}}$ . This small maximum error justifies the assumption of  $d = 1$  in the Eberhart model for the purpose of calculating  $SS_{\text{crit}}$ .

## S2 Computational flowchart for the quaternary Eberhart–Monolayer model

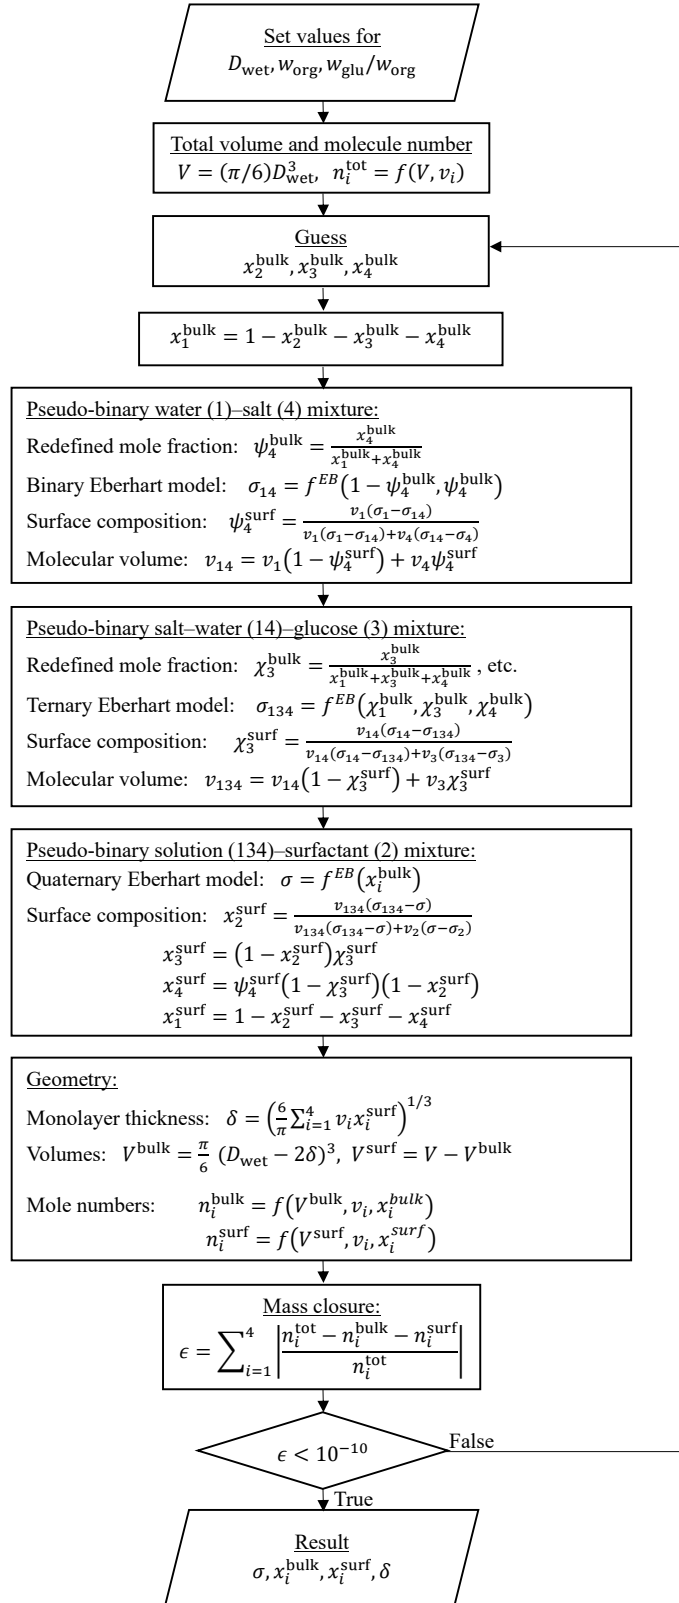

Figure S2: Flowchart for calculating bulk–surface partitioning with the Eberhart–Monolayer model for a quaternary mixture.

### S3 Influence of solution non-ideality

The water activity (Raoult effect) plays an important role in the calculation of the critical supersaturation via Eq. 1. To test the sensitivity of  $SS_{\text{crit}}$  on the choice of  $a_w$ , Köhler curves were constructed based on four different ways to calculate  $a_w$ .

**First**, an ideal solution is assumed, i.e.,  $a_w = \hat{x}_w$ , where  $\hat{x}_w$  is calculated based on the dissociation of NaCl into 2 ions and no dissociation of the organic substances (labelled "ideal").

**Second**, to consider solution non-ideality,  $a_w$  is calculated with AIOMFAC. Note that liquid–liquid phase separation is not considered in that calculation, i.e., all substances are forced to be in one phase. We label this second approach "AIOMFAC-1ph".

**Third**, we calculate  $a_w$  assuming that the surfactant is hydrophobic and therefore entirely present in a separate phase, e.g., in the form of micelles or as a surface layer (labelled "surfactant hydrophobic"). In this case, the surfactant is not contributing to the Raoult effect, i.e., the bulk mole fractions are converted to "surfactant-free" mole fractions  $\tilde{x}$ . For a system of water(1)–surfactant(2)–glucose(3)–NaCl(4), for example, the surfactant-free mole fraction of water would be calculated as  $\tilde{x}_1 = x_1/(x_1 + x_3 + x_4)$ . Based on  $\tilde{x}_1, \tilde{x}_3$ , and  $\tilde{x}_4$ ,  $a_w$  is calculated with AIOMFAC. We label this third approach as "surfactant hydrophobic".

**Fourth**, we combine the "surfactant hydrophobic" case with AIOMFAC-1ph by taking the minimum  $a_w$  of both.

To test their influence, we use all four assumptions to calculate Köhler curves with either

1. the Eberhart–Monolayer model ( $a_w$  is calculated based on  $x_i^{\text{bulk}}$ ,  $\sigma = f(x_i^{\text{bulk}})$ ,
2. a calculation neglecting bulk depletion ( $a_w$  is calculated based on  $x_i^{\text{tot}}$ ,  $\sigma = f(x_i^{\text{tot}})$ , and
3. Classical Köhler theory ( $a_w$  is calculated based on  $x_i^{\text{tot}}$ ,  $\sigma = \sigma_1$ ).

The result of this comparison for an SDS–glucose–NaCl particle of  $D_{\text{dry}} = 50$  nm particle is shown in Fig. S3. In the second row of all three columns it can be seen that  $a_w$  predicted with AIOMFAC-1ph (blue dashed line) is higher than the one assuming a hydrophobic surfactant (yellow dashed line) at low wet diameters. Therefore, the particle is assumed to undergo LLPS in that range and the best estimate (black solid line) follows the "surfactant hydrophobic" calculation. As soon as AIOMFAC-1ph predicts a lower  $a_w$  than "surfactant hydrophobic" (blue and yellow lines are crossing), the droplet is assumed to be one homogeneous phase and the best estimate follows AIOMFAC-1ph. This results in a local maximum in  $a_w$ , which shows up in the Köhler curve (first row), too. In the first two columns, this local maximum is also the global maximum and marks  $SS_{\text{crit}}$ . In both the calculation with the Eberhart–Monolayer model and assuming no bulk depletion, during the LLPS the surface tension of the droplet is that of pure SDS ( $\sigma = \sigma_2$ ) leading to a similar Kelvin effect for both assumptions and therefore also to a similar  $SS_{\text{crit}}$ . The only difference between the two approaches is that in the Eberhart–Monolayer model the bulk is slightly depleted in SDS (see fourth row), which causes the LLPS to stop at a lower wet diameter. In the calculation using classical Köhler theory,  $\sigma = \sigma_1$  (see third row) which causes a much higher Kelvin effect and a much higher  $SS_{\text{crit}}$  than in the first two model approaches.

Figure S4 shows the same calculation for a pinonic acid–NaCl particle of  $D_{\text{dry}} = 50$  nm and the same trends can be observed as in the previous example. In contrast to the calculation with SDS, here the surface tension is reduced less in the first two columns leading to a smaller difference in  $SS_{\text{crit}}$  between classical Köhler theory and the first two columns. From these two examples, it can be seen that in cases with high organic fraction and small dry diameters, the particles have little hygroscopic growth and, as a result, are still in a phase-separated state at activation leading to increased  $SS_{\text{crit}}$  values compared to a calculation assuming ideality.

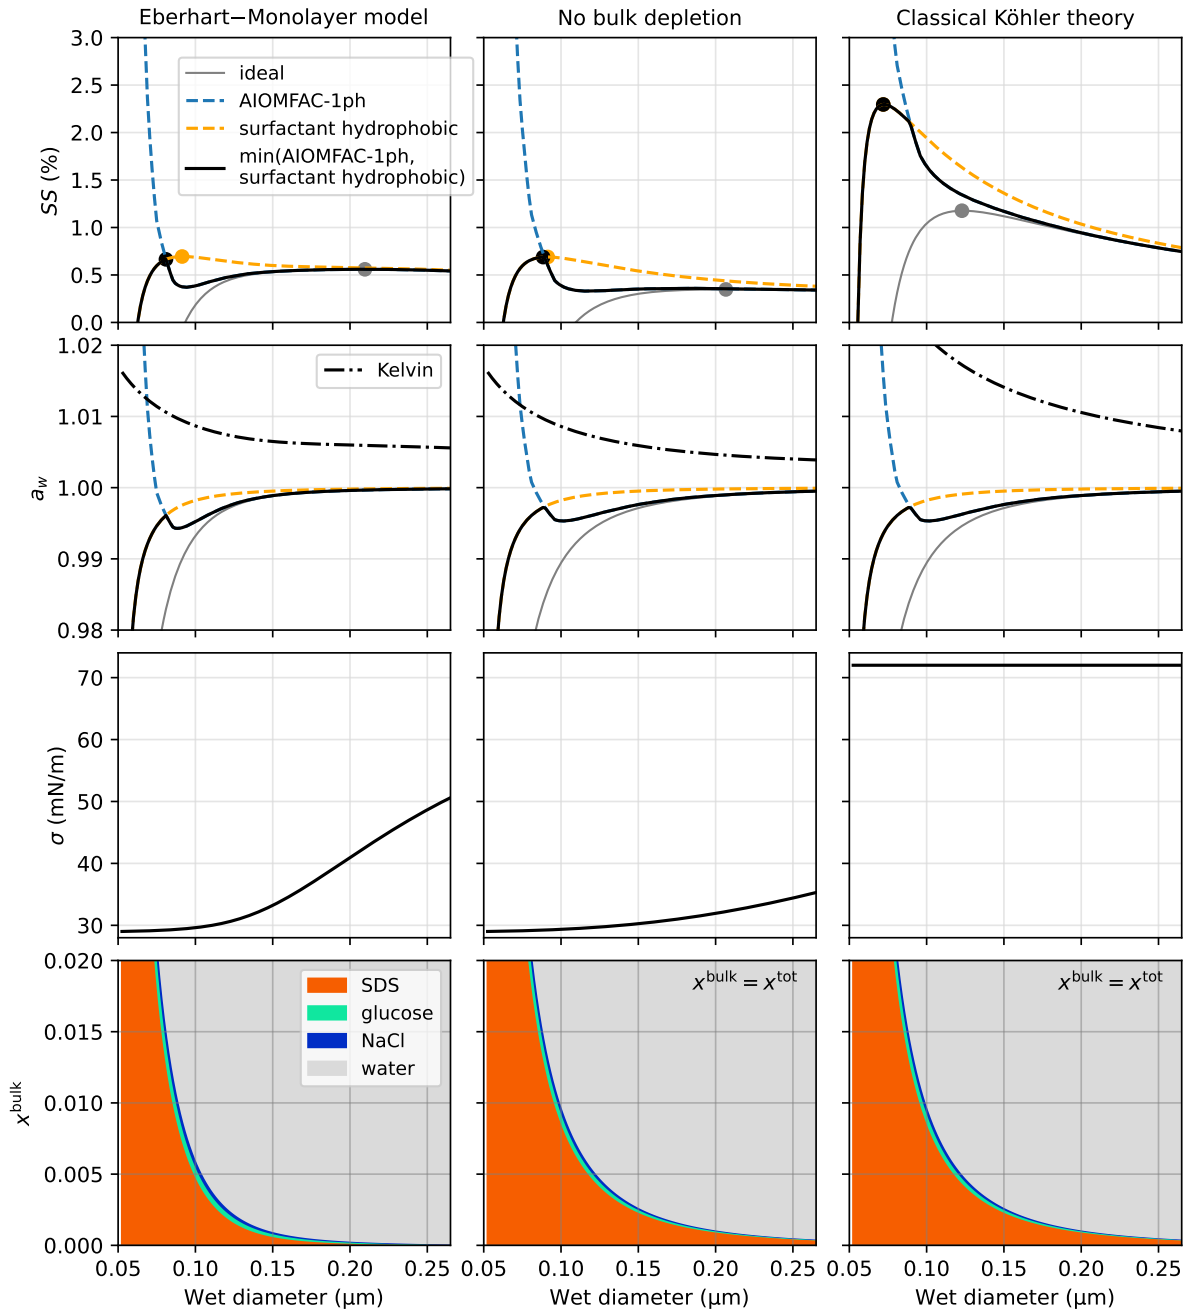

Figure S3: Köhler curves calculated with the Eberhart–Monolayer model, assuming no bulk depletion, and with Classical Köhler theory for a SDS–glucose–NaCl particle with  $D_{\text{dry}} = 50$  nm, organic fraction “high” and  $w_{\text{glu}}/w_{\text{org}} = 0.05$ . First row: Köhler curve and critical supersaturation (circle). Second row: water activity  $a_w$  (Raoult effect) and saturation ratio of the Kelvin effect, calculated with the exponential function in Eq. 1. Third row: droplet surface tension. Fourth row: bulk composition (first column) and total composition (second and third column). The y-axis range was limited to 0–0.02 for a better visibility of the solute share.

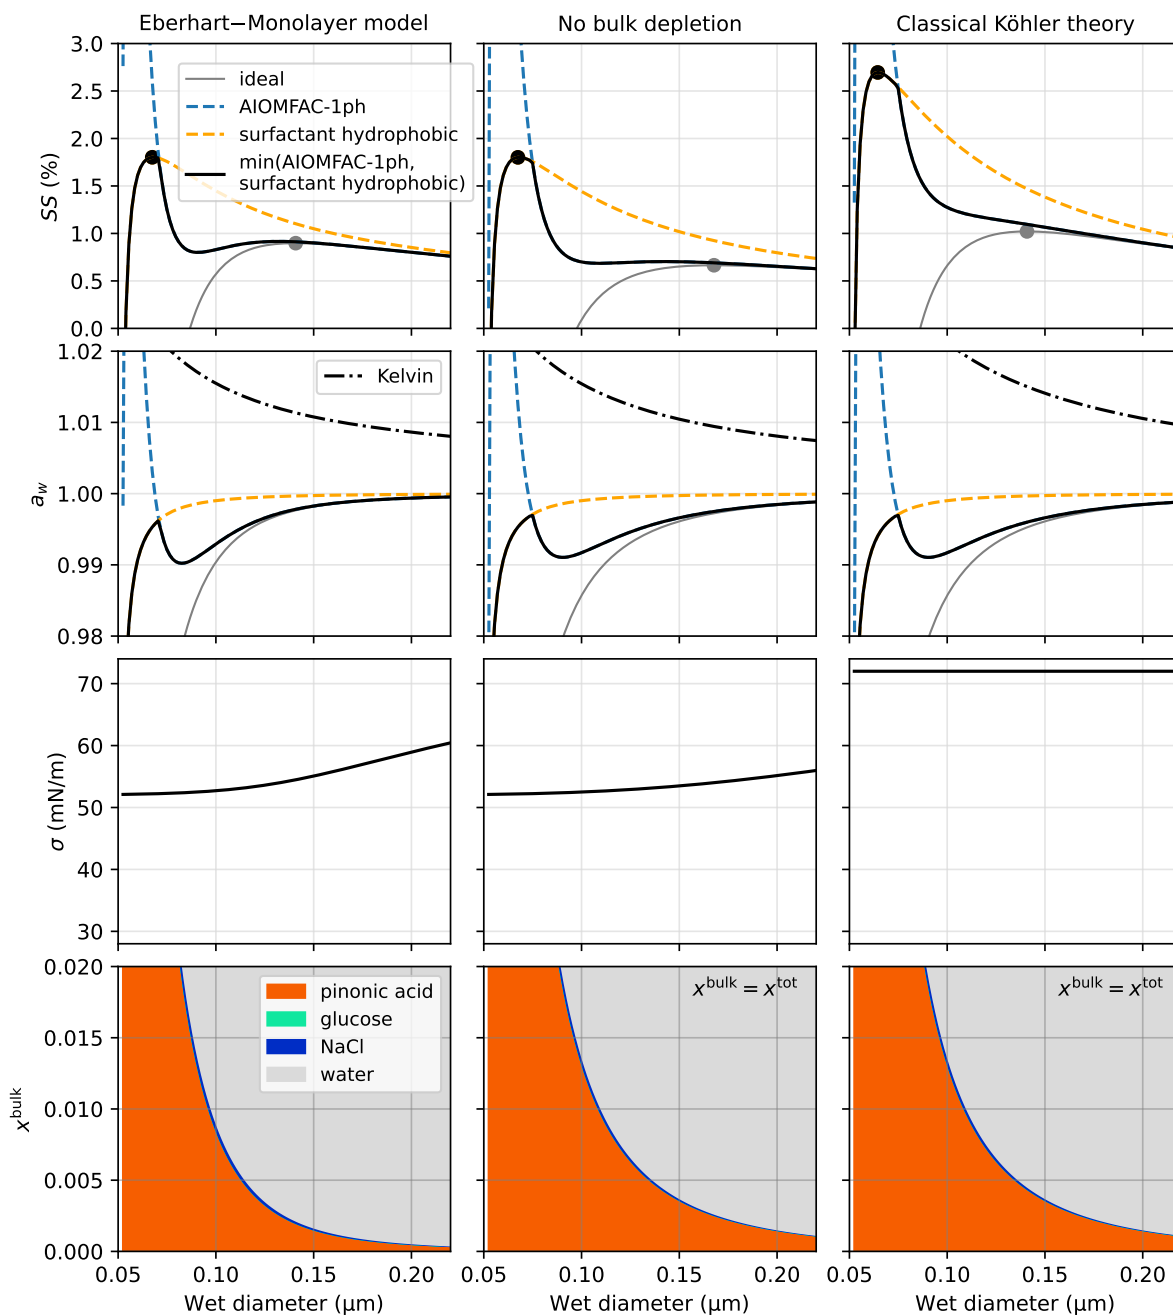

Figure S4: Köhler curves calculated with the Eberhart–Monolayer model, assuming no bulk depletion, and with Classical Köhler theory for a pinonic acid–NaCl particle with  $D_{\text{dry}} = 50$  nm, organic fraction ”high” and  $w_{\text{glu}}/w_{\text{org}} = 0$ . First row: Köhler curve and critical supersaturation (circle). Second row: water activity  $a_w$  (Raoult effect) and saturation ratio of the Kelvin effect, calculated with the exponential function in Eq. 1. Third row: droplet surface tension. Fourth row: bulk composition (first column) and total composition (second and third column). The y-axis range was limited to 0–0.02 for a better visibility of the solute share.

## S4 Eberhart fit parameters of organic substances

Table S1: Eberhart fit parameters of acids, alcohols, ketones, and aldehydes shown in Fig. 3. Substances with a star correspond to those denoted by a star in Fig. 3.  $CI_{95}$  is the 95% confidence interval of parameters that were fitted. References for  $\sigma_i$  values from measurements (i.e., that have no  $CI_{95}$  value) can be found in El Haber et al. (2024). RMSE is the root mean square error.

| No. | name                     | $S_{1i}$ | $CI_{95}(S_{1i})$ | $\sigma_i$<br>(mN m <sup>-1</sup> ) | $CI_{95}(\sigma_i)$<br>(mN m <sup>-1</sup> ) | $\sigma_1$<br>(mN m <sup>-1</sup> ) | RMSE<br>(mN m <sup>-1</sup> ) |
|-----|--------------------------|----------|-------------------|-------------------------------------|----------------------------------------------|-------------------------------------|-------------------------------|
| ★   | propionic acid           | 55.3     | 4.6               | 26.2                                |                                              | 72.0                                | 0.664                         |
| ★   | valeric acid             | 974.6    | 36.6              | 26.7                                |                                              | 72.0                                | 0.073                         |
| ★   | glutaric acid            | 67.3     | 10.5              | 53.1                                | 0.8                                          | 72.0                                | 0.026                         |
| ★   | pinonic acid             | 3.7e3    | 1.5e3             | 52.1                                | 3.6                                          | 72.0                                | 0.075                         |
| ★   | oleic acid               | 9.9e6    | 4.4e6             | 32.2                                |                                              | 72.0                                | 0.618                         |
| 1   | formic acid              | 5.4      | 0.5               | 37.5                                |                                              | 72.0                                | 0.014                         |
| 2   | acetic acid              | 15.6     | 1.3               | 27.9                                |                                              | 72.0                                | 0.257                         |
| 3   | butyric acid             | 199.2    | 12.1              | 26.2                                |                                              | 72.0                                | 0.053                         |
| 4   | oxalic acid              | 16.8     | 9.4               | 62.7                                | 3.4                                          | 72.0                                | 0.117                         |
| 5   | methanesulfonic acid     | 13.9     | 2.4               | 53.0                                |                                              | 72.0                                | 0.002                         |
| 6   | malonic acid             | 26.7     | 5.8               | 60.5                                | 0.9                                          | 72.0                                | 0.068                         |
| 7   | maleic acid              | 33.4     | 8.6               | 55.2                                | 1.5                                          | 72.0                                | 0.062                         |
| 8   | caproic acid             | 4.5e3    | 4.5e2             | 27.5                                |                                              | 72.0                                | 0.037                         |
| 9   | succinic acid            | 119.1    | 55.1              | 64.2                                | 1.8                                          | 72.0                                | 0.024                         |
| 10  | malic acid               | 35.2     | 15.7              | 66.2                                | 0.9                                          | 72.0                                | 0.021                         |
| 11  | caprylic acid            | 4.2e4    | 7.8e3             | 28.8                                |                                              | 72.0                                | 0.714                         |
| 12  | adipic acid              | 596.2    | 228.0             | 60.8                                | 2.3                                          | 72.0                                | 0.09                          |
| 13  | pelargonic acid          | 2.0e5    | 2.2e4             | 27.9                                |                                              | 72.0                                | 0.412                         |
| 14  | citric acid              | 87.8     | 48.7              | 65.1                                | 1.0                                          | 72.0                                | 0.067                         |
| 15  | ricinoleic acid          | 1.9e6    | 4.8e5             | 32.9                                | 1.7                                          | 72.0                                | 0.421                         |
| 16  | arachidonic acid         | 5.2e6    | 1.5e6             | 29.0                                | 2.6                                          | 72.0                                | 0.003                         |
| 17  | methanol                 | 7.3      | 0.3               | 23.5                                |                                              | 72.0                                | 0.016                         |
| 18  | ethanol                  | 20.1     | 0.8               | 22.2                                |                                              | 72.0                                | 0.458                         |
| 19  | acetone                  | 24.7     | 2.4               | 23.5                                |                                              | 72.0                                | 0.385                         |
| 20  | propan-1-ol              | 95.0     | 7.0               | 24.0                                |                                              | 72.0                                | 0.394                         |
| 21  | propan-2-ol              | 69.8     | 7.6               | 23.5                                |                                              | 72.0                                | 0.734                         |
| 22  | ethylene glycol          | 6.6      | 0.5               | 46.6                                |                                              | 72.0                                | 0.038                         |
| 23  | propylene glycol         | 14.8     | 0.8               | 35.9                                |                                              | 72.0                                | 0.07                          |
| 24  | propane-1,3-diol         | 12.8     | 2.2               | 46.3                                |                                              | 72.0                                | 0.216                         |
| 25  | pentan-1-ol              | 1.3e3    | 1.4e2             | 25.2                                |                                              | 72.0                                | 0.105                         |
| 26  | 1,3-butanediol           | 27.2     | 3.1               | 37.0                                |                                              | 72.0                                | 0.291                         |
| 27  | 1,4-butanediol           | 22.9     | 3.6               | 43.8                                |                                              | 72.0                                | 0.275                         |
| 28  | glycerol                 | 4.4      | 0.9               | 63.0                                |                                              | 72.0                                | 0.031                         |
| 29  | hexan-1-ol               | 4.3e3    | 4.5e2             | 25.8                                |                                              | 72.0                                | 0.028                         |
| 30  | hexan-2-ol               | 2.6e3    | 1.1e2             | 24.5                                |                                              | 72.0                                | 0.374                         |
| 31  | 2,3-dimethylbutan-2-ol   | 1.2e3    | 9.7e1             | 23.7                                |                                              | 72.0                                | 0.753                         |
| 32  | 2-methylpentan-2-ol      | 1.8e3    | 1.1e2             | 23.7                                |                                              | 72.0                                | 0.317                         |
| 33  | 1,5-pentanediol          | 355.2    | 175.9             | 44.2                                |                                              | 72.0                                | 0.22                          |
| 34  | heptan-1-ol              | 2.3e4    | 3.9e3             | 26.6                                |                                              | 72.0                                | 0.108                         |
| 35  | hexane-1,2-diol          | 707.7    | 69.7              | 23.8                                |                                              | 72.0                                | 0.364                         |
| 36  | hexane-1,6-diol          | 324.1    | 38.0              | 42.3                                | 0.7                                          | 72.0                                | 0.061                         |
| 37  | hexane-1,5-diol          | 234.3    | 31.5              | 33.9                                |                                              | 72.0                                | 0.042                         |
| 38  | hexane-2,5-diol          | 132.0    | 20.1              | 31.6                                |                                              | 72.0                                | 0.522                         |
| 39  | octan-1-ol               | 3.6e4    | 8.8e3             | 27.2                                |                                              | 72.0                                | 0.144                         |
| 40  | 2,3-dihydroxynaphthalene | 5.2e4    | 8.3e3             | 48.2                                | 1.0                                          | 72.0                                | 0.006                         |

Table S1 (continued): Eberhart fit parameters of sugars, amines, surfactants, and macromolecules shown in Fig. 3. Substances with a star correspond to those denoted by a star in Fig. 3.  $CI_{95}$  is the 95% confidence interval of parameters that were fitted. References for  $\sigma_i$  values that have been measured (i.e., that have no  $CI_{95}$  value) can be found in El Haber et al. (2024). RMSE is the root mean square error.

| No. | name                       | $S_{1i}$ | $CI_{95}(S_{1i})$ | $\sigma_i$<br>(mN m <sup>-1</sup> ) | $CI_{95}(\sigma_i)$<br>(mN m <sup>-1</sup> ) | $\sigma_1$<br>(mN m <sup>-1</sup> ) | RMSE<br>(mN m <sup>-1</sup> ) |
|-----|----------------------------|----------|-------------------|-------------------------------------|----------------------------------------------|-------------------------------------|-------------------------------|
| 41  | colamine                   | 6.8      | 1.2               | 48.4                                |                                              | 72.0                                | 0.258                         |
| 42  | pyrrolidine                | 25.3     | 6.9               | 29.7                                |                                              | 72.0                                | 1.223                         |
| 43  | threamine                  | 9.8      | 2.5               | 37.4                                |                                              | 72.0                                | 0.351                         |
| 44  | 3-aminopropan-1-ol         | 6.5      | 0.5               | 44.3                                |                                              | 72.0                                | 0.046                         |
| 45  | 2-(methylamino)ethan-1-ol  | 9.6      | 1.3               | 35.3                                |                                              | 72.0                                | 0.208                         |
| 46  | piperidine                 | 108.1    | 37.0              | 29.5                                |                                              | 72.0                                | 1.051                         |
| 47  | 2-(ethylamino)ethan-1-ol   | 26.6     | 8.5               | 32.2                                |                                              | 72.0                                | 1.108                         |
| 48  | cyclohexanamine            | 885.3    | 140.5             | 32.1                                |                                              | 72.0                                | 0.741                         |
| 49  | diolamine                  | 9.8      | 2.3               | 47.2                                |                                              | 72.0                                | 0.035                         |
| 50  | methyl diethanolamine      | 19.3     | 2.4               | 38.2                                |                                              | 72.0                                | 0.164                         |
| 51  | DL-norleucine              | 568.3    | 561.2             | 68.1                                | 2.4                                          | 72.0                                | 0.016                         |
| 52  | hexamethylenetetramine     | 117.8    | 6.8               | 62.3                                | 0.1                                          | 72.0                                | 0.006                         |
| 53  | trolamine                  | 23.1     | 0.2               | 46.0                                |                                              | 72.0                                | 0.015                         |
| 54  | levoglucosan               | 45.3     | 94.0              | 69.5                                | 2.0                                          | 72.0                                | 0.508                         |
| 55  | D-(+)-maltose              | 9.0      | 6.7               | 63.9                                | 4.8                                          | 72.0                                | 0.009                         |
| ★   | SDS                        | 1.4e4    | 2.7e3             | 29.0                                | 2.6                                          | 72.0                                | 0.591                         |
| 56  | DTAB                       | 8.3e3    | 2.1e3             | 28.6                                | 3.6                                          | 72.0                                | 0.579                         |
| 57  | CTAB                       | 1.5e5    | 1.9e4             | 29.2                                | 1.8                                          | 72.0                                | 0.259                         |
| 58  | AOT                        | 1.3e5    | 2.1e4             | 27.6                                | 1.4                                          | 72.0                                | 0.301                         |
| 59  | Triton X114                | 5.5e6    | 1.6e6             | 30.2                                | 1.4                                          | 72.0                                | 0.528                         |
| 60  | Brij35                     | 5.5e6    | 1.4e6             | 43.7                                | 1.2                                          | 72.0                                | 0.165                         |
| 61  | mono-rhamnolipid           | 7.7e6    | 2.7e6             | 27.0                                | 2.9                                          | 72.0                                | 0.858                         |
| 62  | di-rhamnolipid             | 7.0e6    | 1.8e6             | 30.4                                | 2.1                                          | 72.0                                | 0.434                         |
| 63  | surfactin                  | 1.4e7    | 7.7e6             | 27.9                                | 5.6                                          | 72.0                                | 0.191                         |
| 64  | syringafactin B/C          | 4.3e5    | 1.8e5             | 19.7                                | 6.2                                          | 72.0                                | 0.609                         |
| 65  | viscosin                   | 8.4e6    | 4.2e6             | 23.9                                | 5.8                                          | 72.0                                | 0.359                         |
| 66  | Suwannee river fulvic acid | 1.3e4    | 3.7e3             | 39.9                                | 2.7                                          | 72.0                                | 0.276                         |
| 67  | NAFA                       | 8.5e4    | 3.3e4             | 45.1                                | 5.0                                          | 72.0                                | 0.156                         |
| 68  | Humic acid                 | 1.7e4    | 1.4e4             | 54.0                                | 3.9                                          | 72.0                                | 0.045                         |
| 69  | HULIS                      | 1.9e5    | 1.6e5             | 45.5                                | 5.9                                          | 72.0                                | 0.229                         |
| 70  | Macromolecules EPS         | 5.4e7    | 3.1e7             | 56.0                                | 2.6                                          | 72.0                                | 0.209                         |



## S5 Surface tension isotherms of atmospheric samples

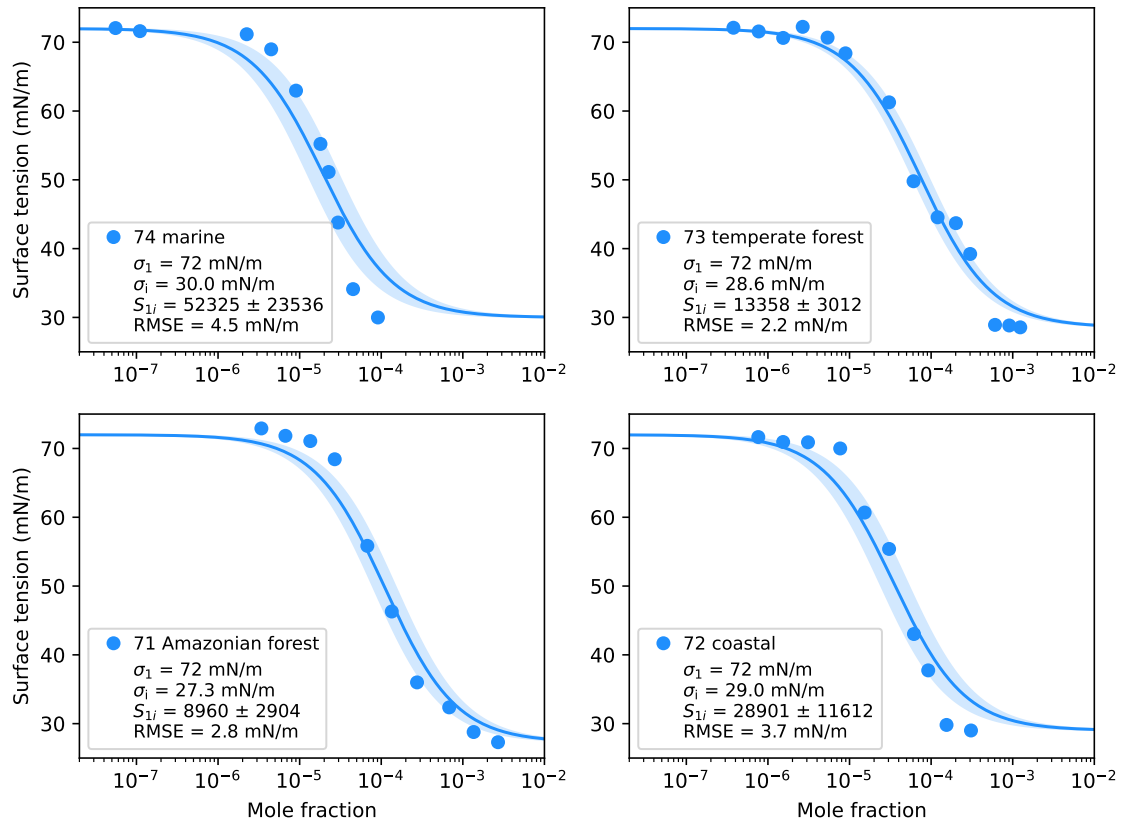

Figure S5: Eberhart model (Eq. 3) fits (solid lines) to surface tension data (markers) of atmospheric sample extracts from Ekström et al. (2010) taken at four different locations. Numbers 71–74 refer to the numbering in Fig. 3. Colored shading shows the 95% confidence interval. In the legend, the model parameters are given.  $\sigma_1$  was set to  $72 \text{ mN m}^{-1}$  for all samples and  $\sigma_i$  was taken to be the minimum of the experimental data.  $S_{1i}$  was fitted and its 95% confidence interval is given as the uncertainty. RMSE is the root mean square error.

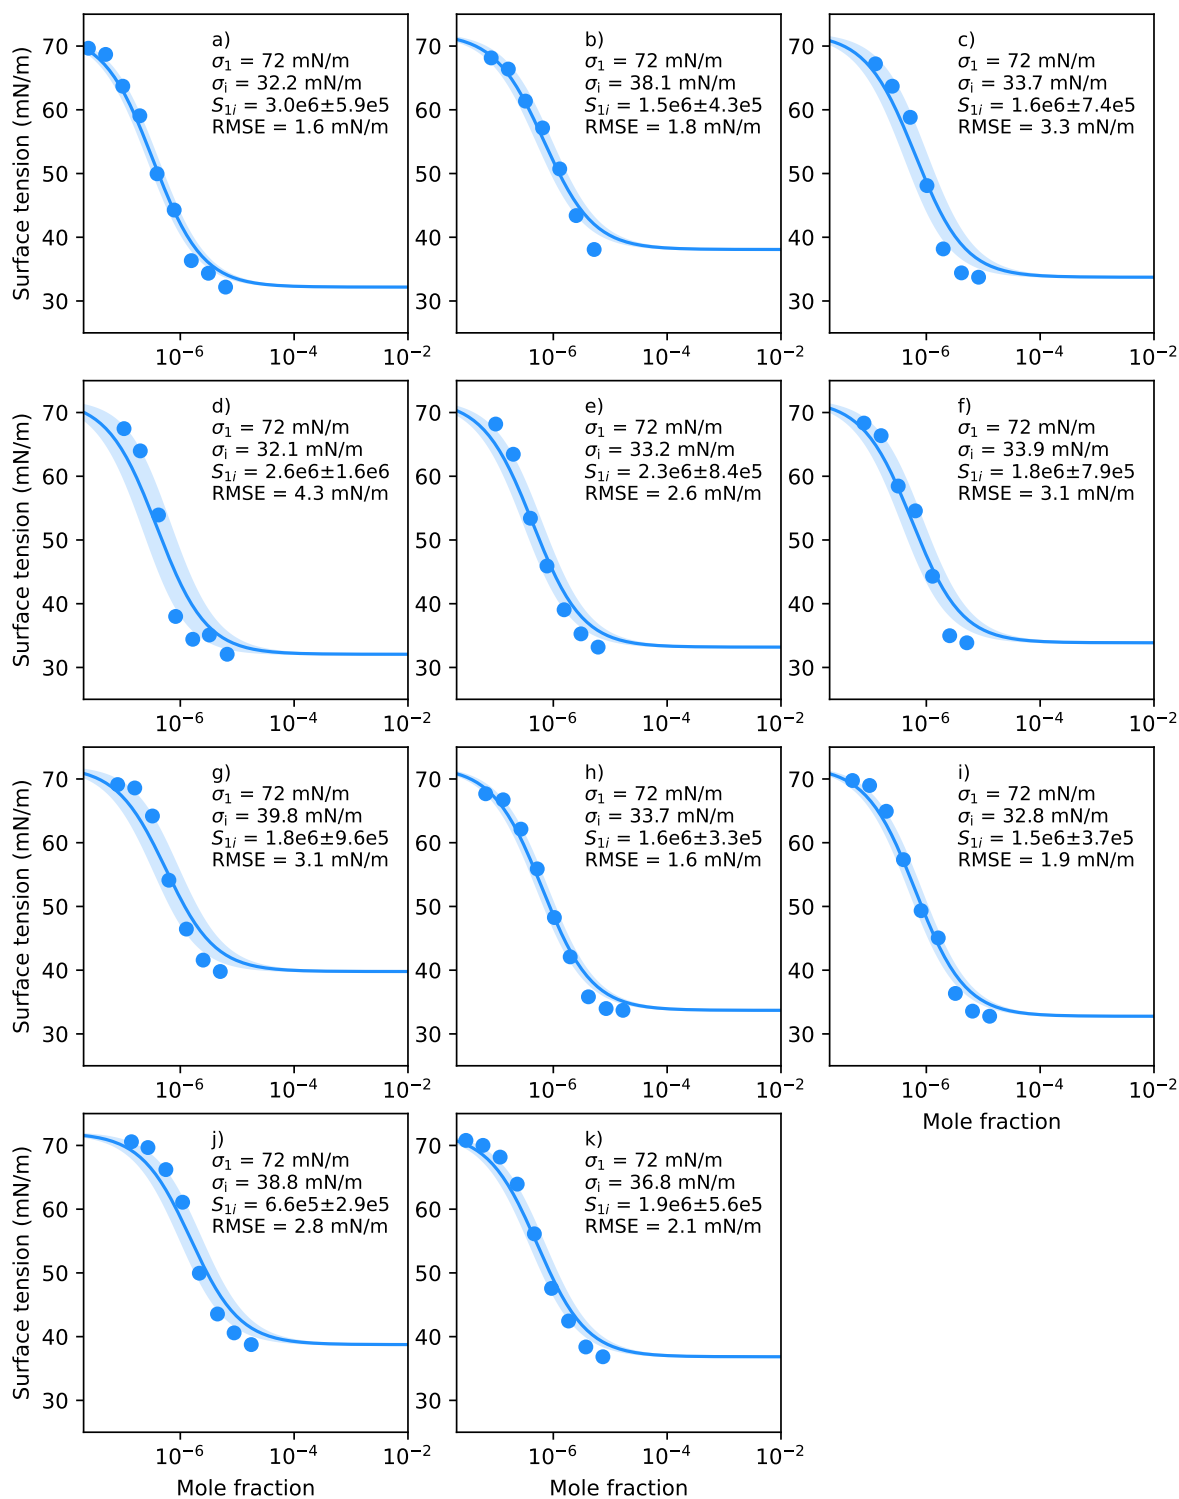

Figure S6: Eberhart model (Eq. 3) fits (solid lines) to surface tension data (markers) of 11 atmospheric sample extracts (a-k) from Gérard et al. (2016) taken at the Baltic Coast at Askö in Sweden. Colored shading shows the 95% confidence interval. In each panel, the model parameters are shown.  $\sigma_1$  was set to  $72 \text{ mN m}^{-1}$  for all samples and  $\sigma_i$  was taken to be the minimum of the experimental data.  $S_{1i}$  was fitted and its 95% confidence interval is given as the uncertainty. RMSE is the root mean square error.

## S6 Surface tension isotherms of the model compounds

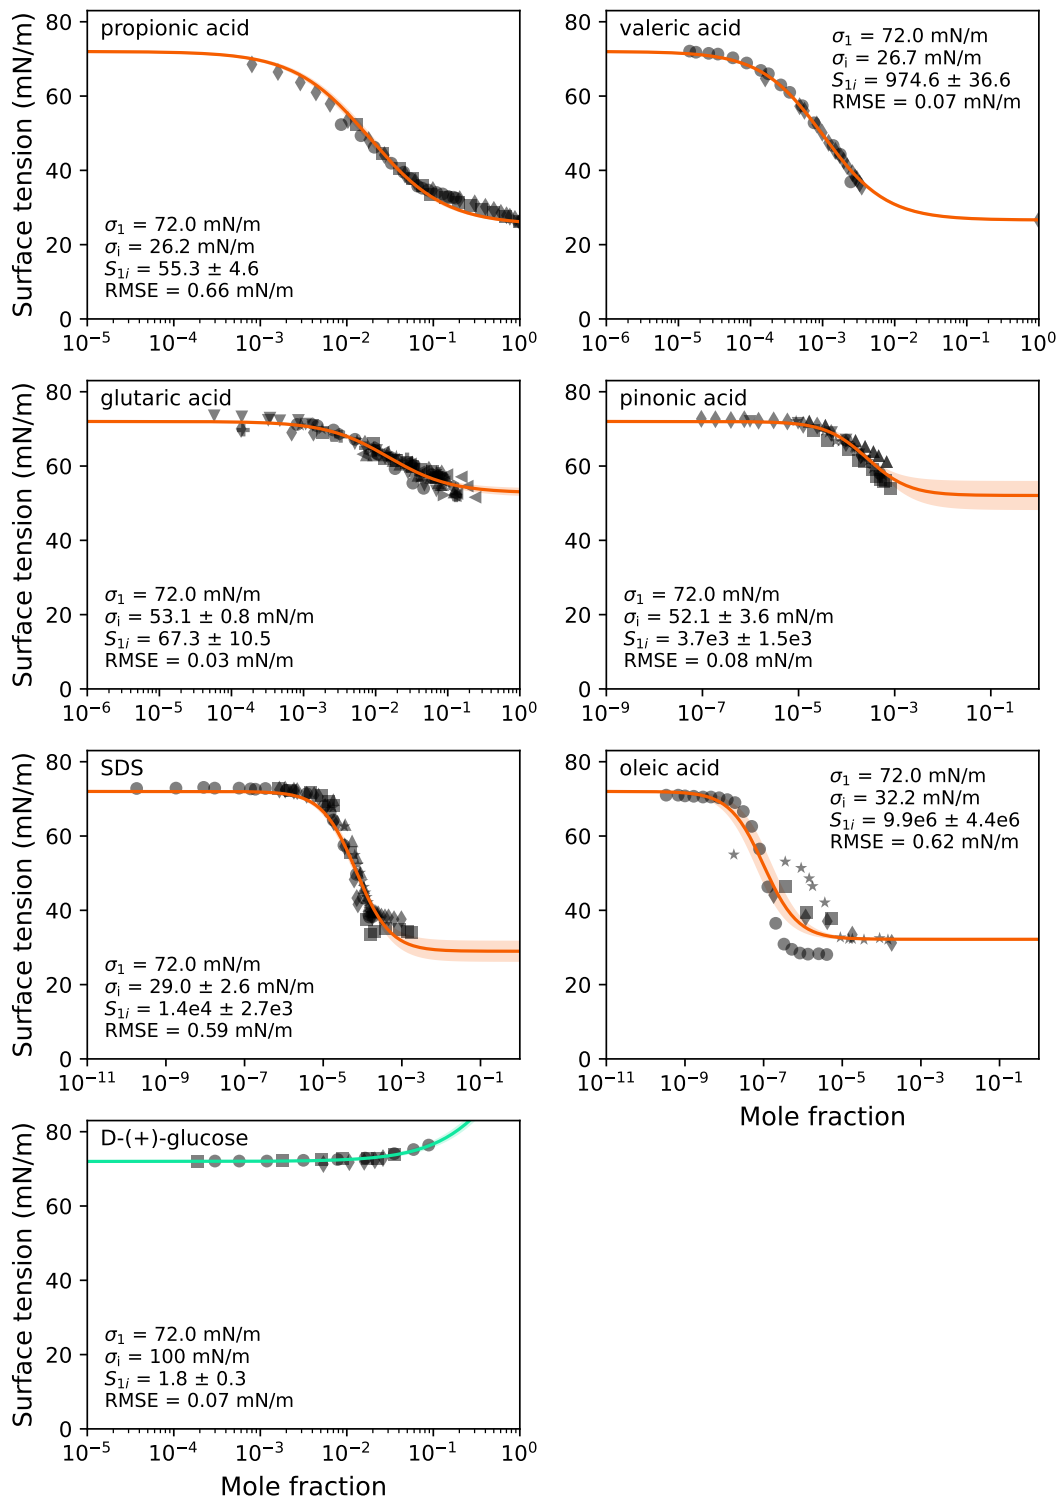

Figure S7: Binary surface tension data (black markers) and Eberhart model fits (colored solid lines) for the model compounds in this study. Fit parameters are annotated in the respective panel together with the root mean square error (RMSE). The colored shading represents the 95% confidence interval of the fit. Different markers represent different datasets. For reference of the underlying data refer to El Haber et al. (2024). For NaCl, refer to Kleinheins et al. (2023).

## S7 Influence of salting-out

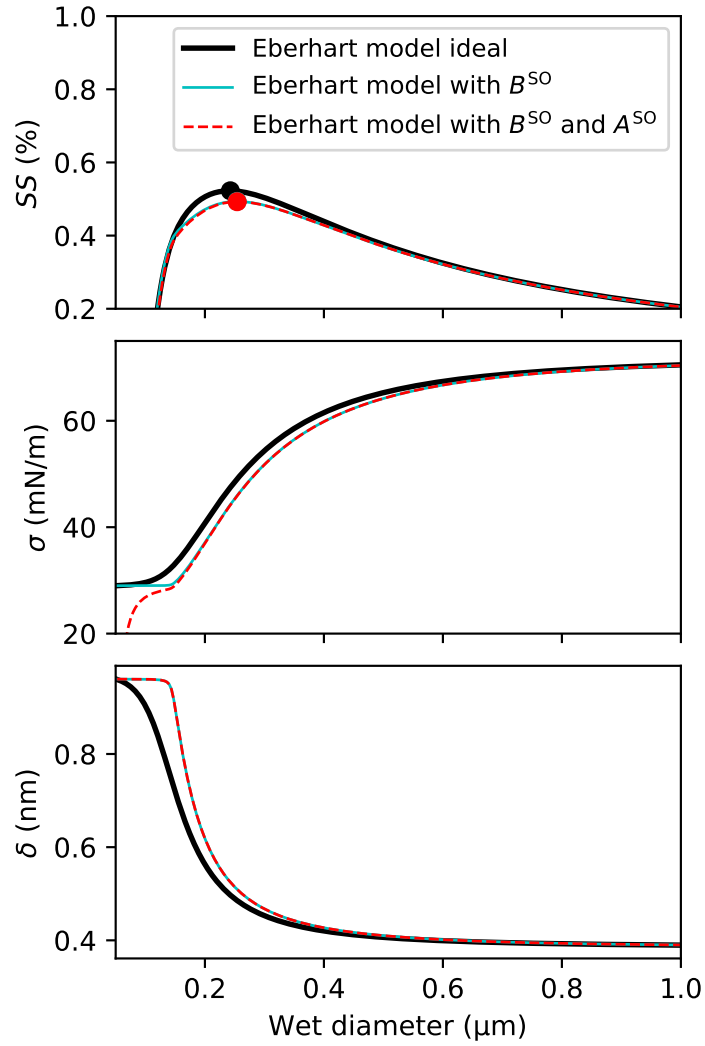

Figure S8: Influence of surface tension non-ideality (salting-out) on the supersaturation  $SS$ , droplet surface tension  $\sigma$ , and the monolayer thickness  $\delta$ , using an artificially high salting-out factor of  $B_{24}^{\text{SO}} = 10^5$ . Three cases are distinguished: assuming ideality (solid black lines,  $A_{24}^{\text{SO}} = 0, B_{24}^{\text{SO}} = 0$ ), considering bulk related salting-out (solid cyan lines  $A_{24}^{\text{SO}} = 0, B_{24}^{\text{SO}} = 10^5$ ), and considering bulk and surface related salting-out (dashed red line,  $A_{24}^{\text{SO}} = 22.63, B_{24}^{\text{SO}} = 10^5$ ). In all cases,  $D_{\text{dry}} = 50$  nm,  $w_{\text{org}} = 0.93$  ("med"), and  $w_{\text{glu}}/w_{\text{org}} = 0$ . First row: Köhler curve and critical supersaturation (circle), second row: droplet surface tension, third row: surface monolayer thickness.

## S8 Köhler curves of additional systems

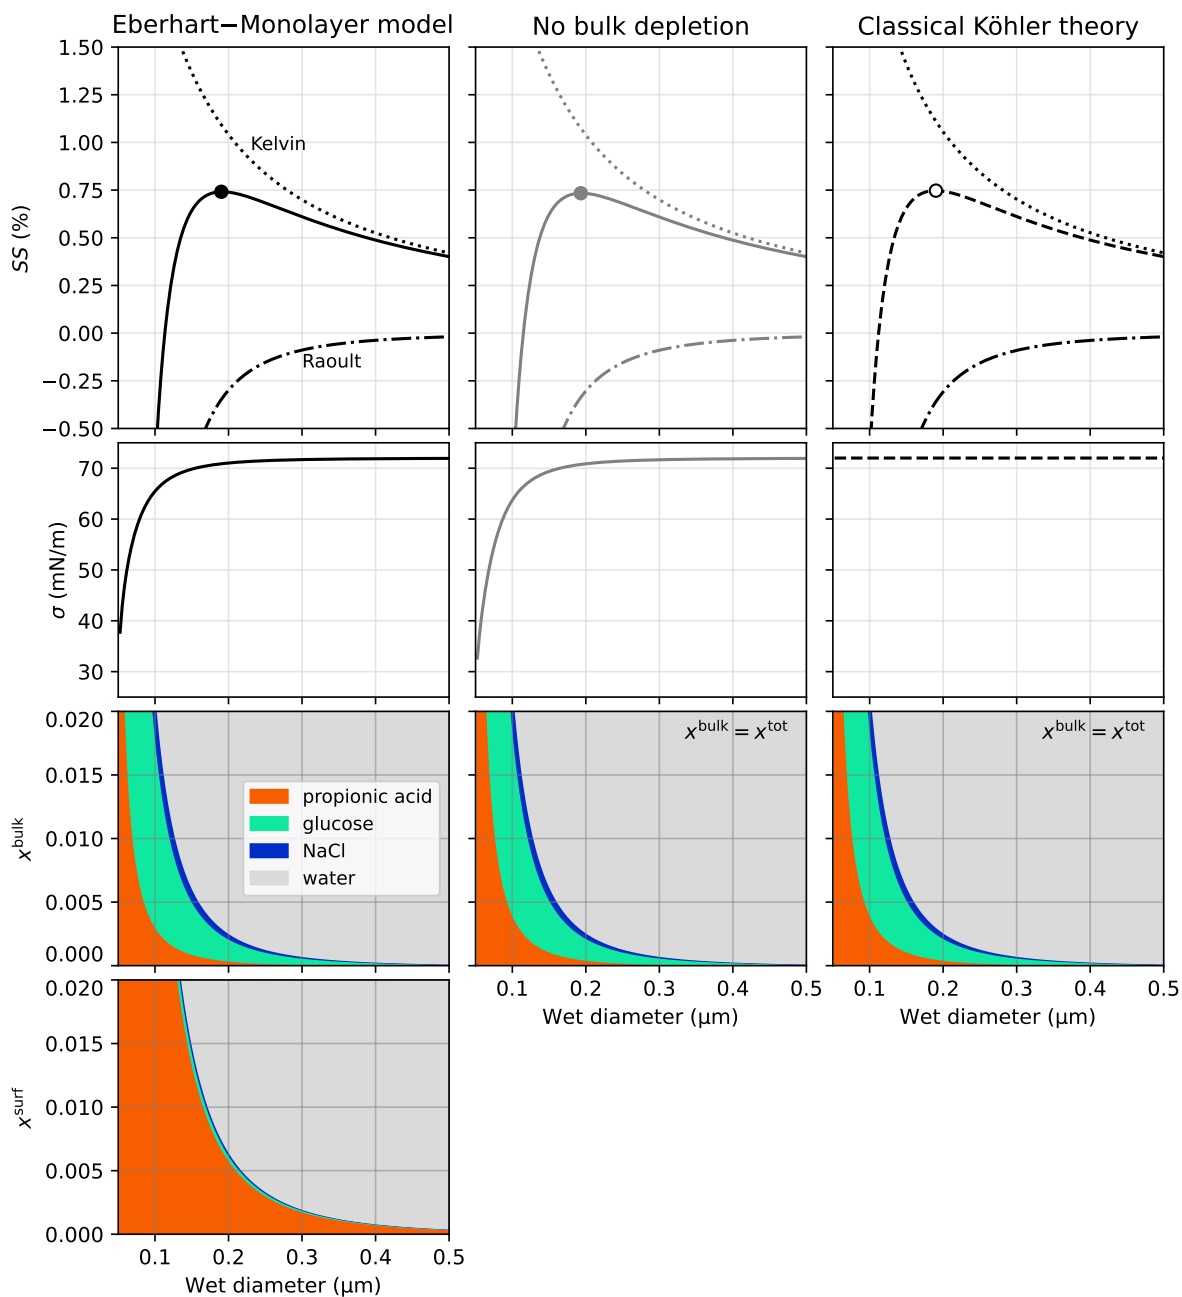

Figure S9: Same as Fig. 4 but using propionic acid instead of SDS and a high fraction of glucose ( $w_{\text{glu}}/w_{\text{org}} = 0.9$ ). In the third and fourth row, the y-axis range was limited to 0–0.02 for a better visibility of the solute share.

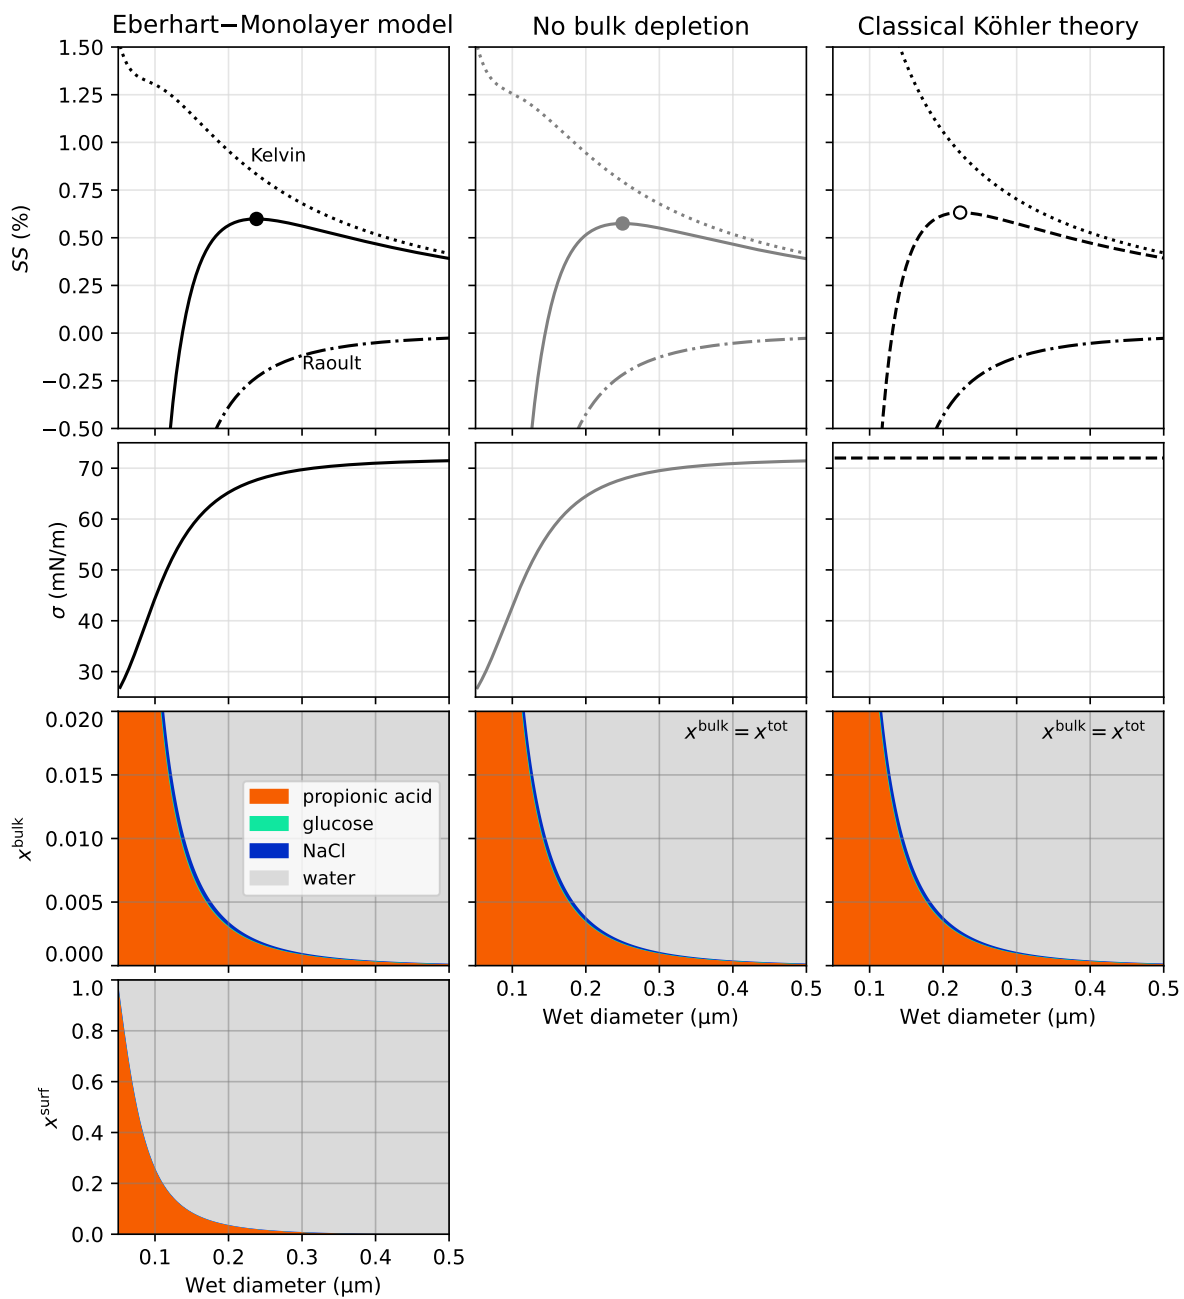

Figure S10: Same as Fig. 4 but using propionic acid instead of SDS.

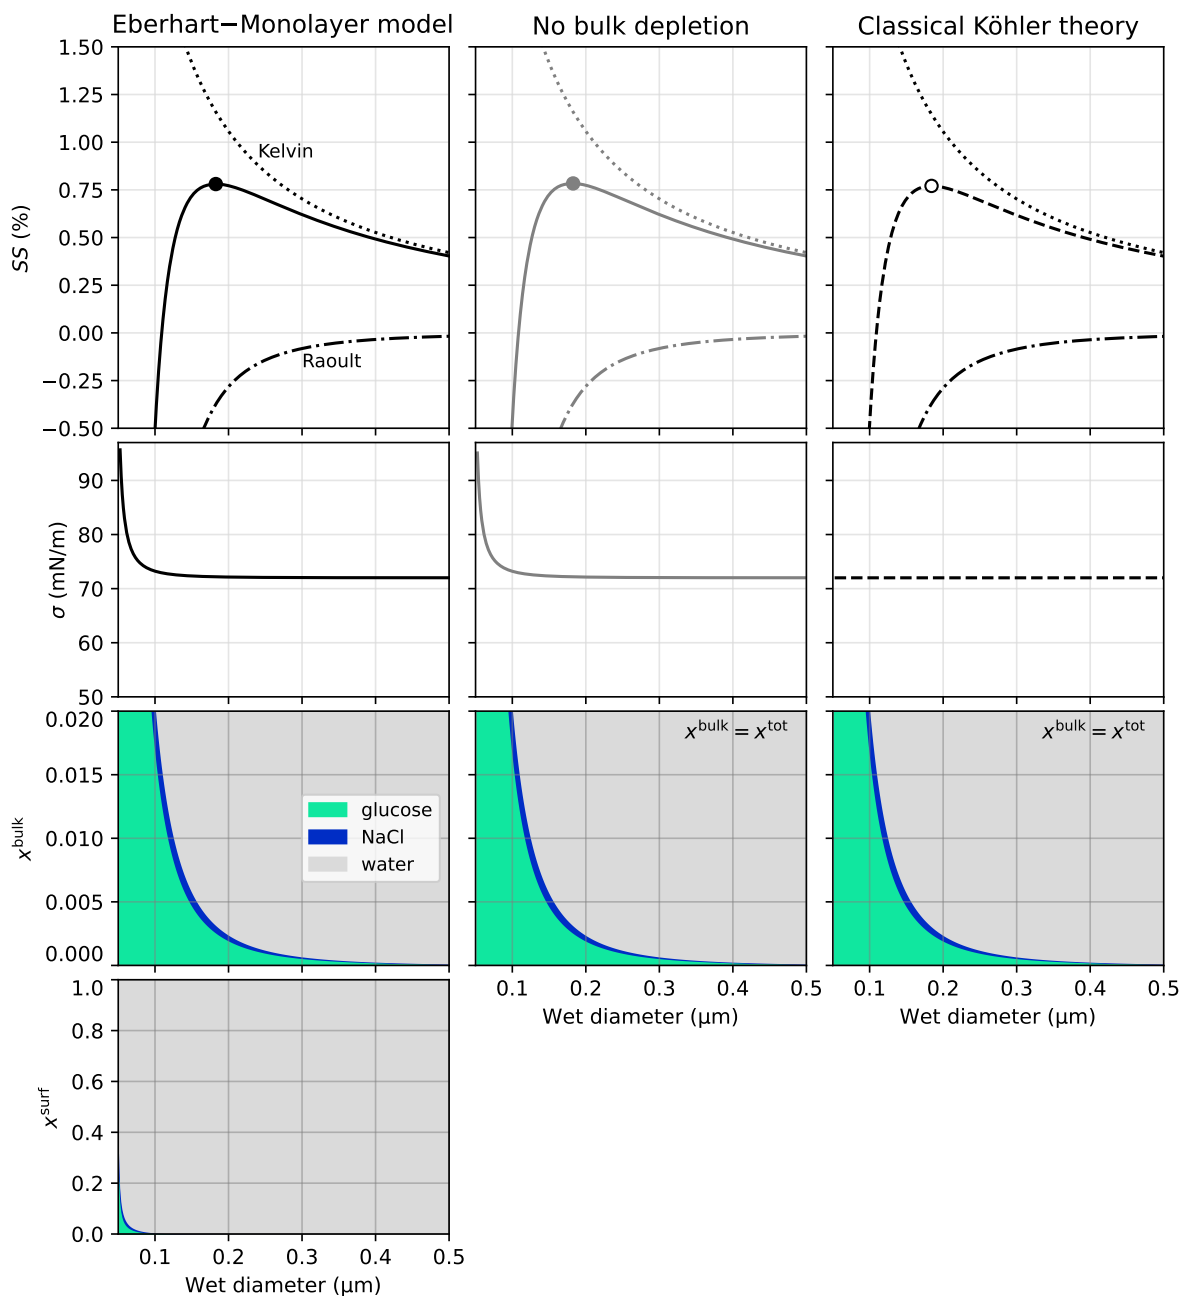

Figure S11: Köhler curves calculated with the Eberhart–Monolayer model, assuming no bulk depletion, and with Classical Köhler theory for a ternary glucose–NaCl–water particle (i.e.,  $w_{\text{glu}}/w_{\text{org}} = 1$ ) with  $D_{\text{dry}} = 50 \text{ nm}$  and  $w_{\text{org}} = 0.93$  ("med"). First row: Köhler curve (solid or dashed line) with Raoult (dash-dotted lines) and Kelvin effect (dotted lines) and critical supersaturation (circle). Second row: droplet surface tension. Third row: bulk composition (first column) and total composition (second and third column). The y-axis range was limited to 0–0.02 for a better visibility of the solute share. Fourth row: surface composition in the Eberhart–Monolayer model. For consistency with the previous plots, the y-axis range is kept here at 0–1. Since no partitioning is calculated in the second and third column, the surface composition is not determined and hence not shown here.

## S9 Variation of the surfactant

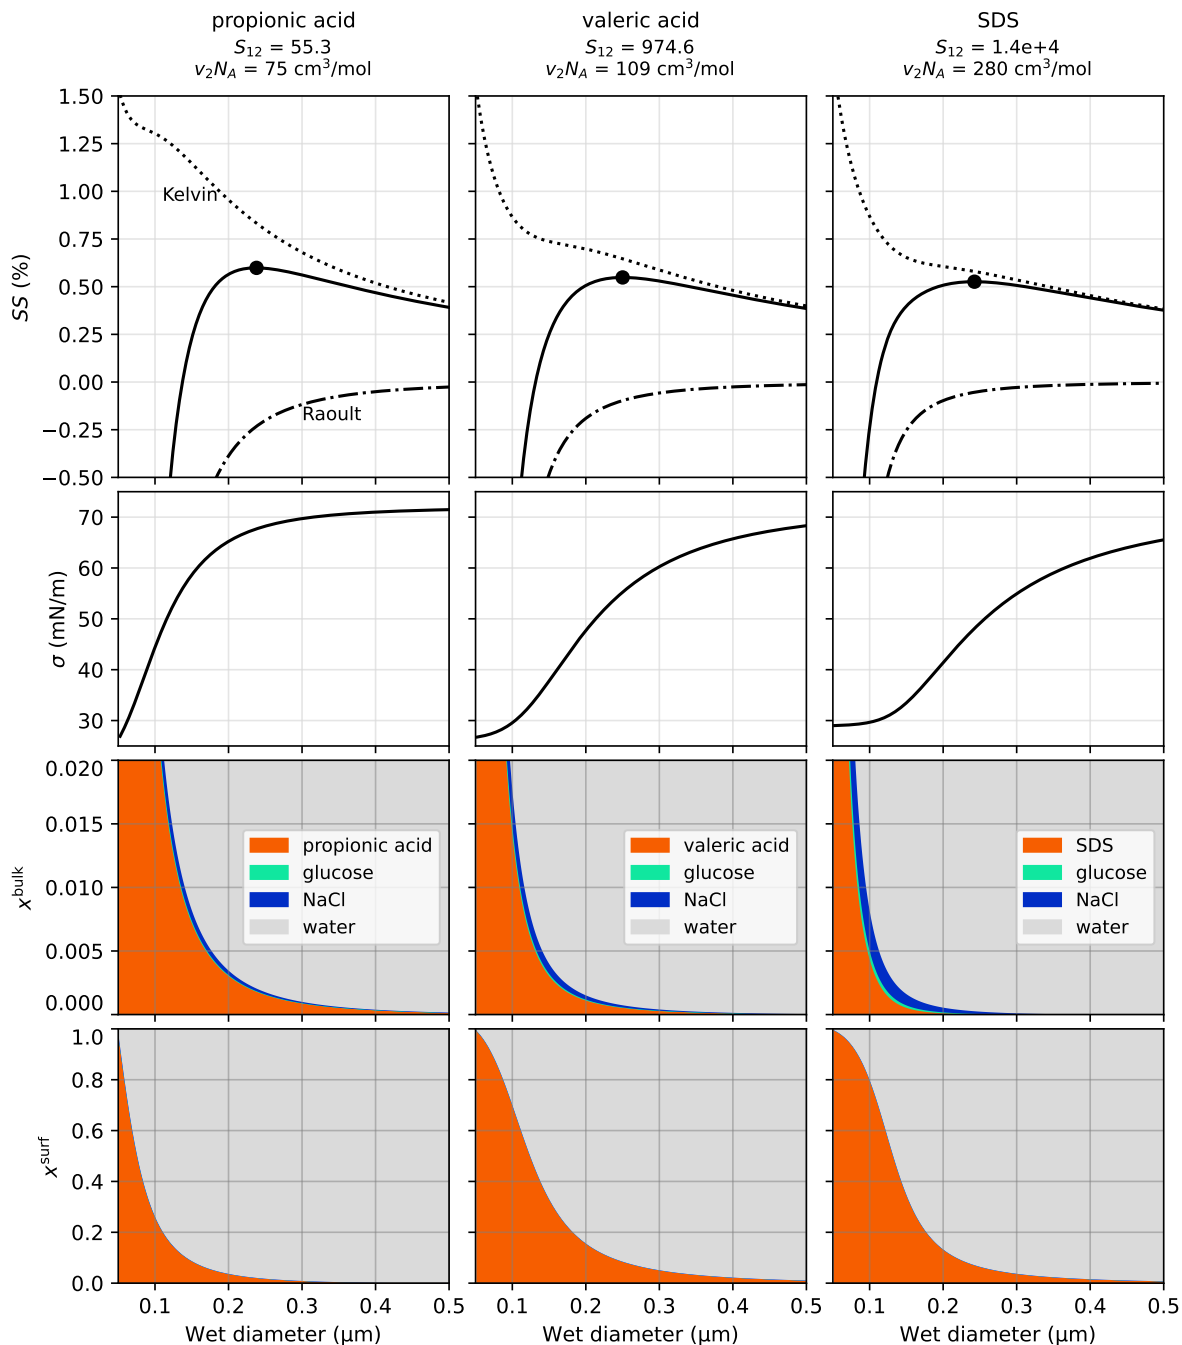

Figure S12: Köhler curves to illustrate the effect of molar volume  $v_2N_A$  on the Raoult effect and separation factor  $S_{12}$  on the Kelvin effect calculated with the Eberhart–Monolayer model for three different surfactants in a quaternary surfactant–glucose–NaCl–water particle ( $D_{\text{dry}} = 50$  nm,  $w_{\text{org}} = 0.93$  (“med”), and  $w_{\text{glu}}/w_{\text{org}} = 0.05$ ). First row: Köhler curve (solid or dashed line) with Raoult (dash-dotted lines) and Kelvin effect (dotted lines) and critical supersaturation (circle), second row: droplet surface tension, third row: bulk composition, and fourth row: surface composition. The y-axis range in the third row was limited to 0–0.02 for a better visibility of the solute share.



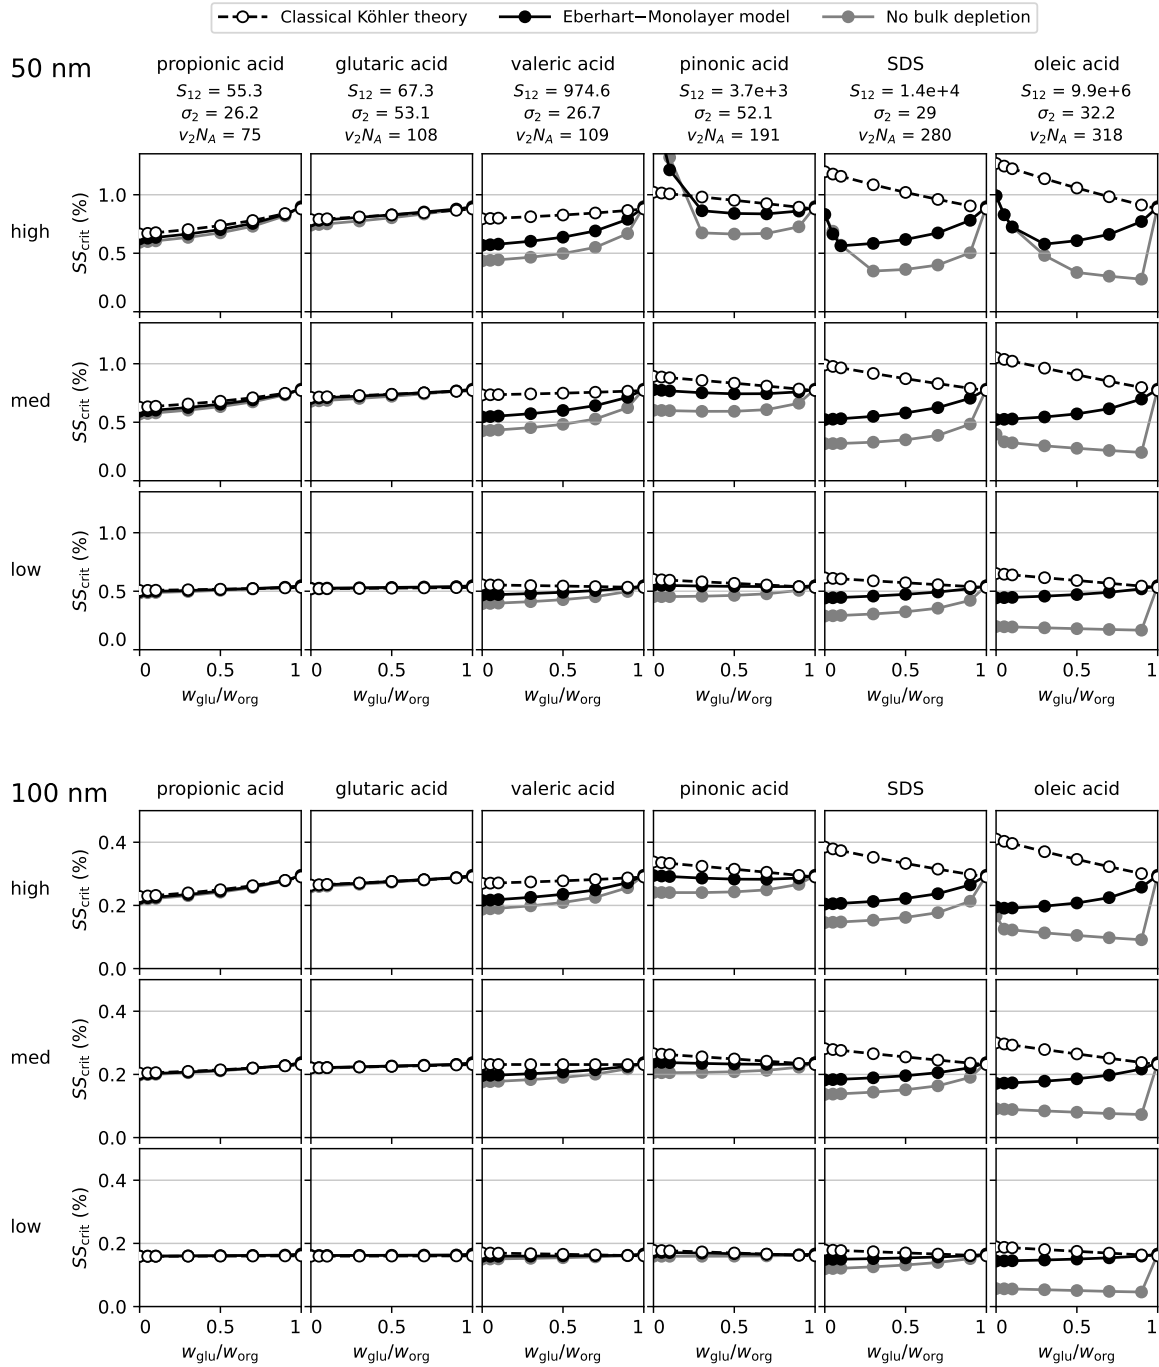

Figure S13: Combined influence of surfactant properties and the organic fraction on critical supersaturation for two different particle sizes. Upper panel:  $D_{\text{dry}} = 50$  nm. Lower panel:  $D_{\text{dry}} = 100$  nm. In the column title, the name of the surfactant, its binary separation factor in water  $S_{12}$ , its pure component surface tension in  $\text{mN m}^{-1}$ , and its molar volume in  $\text{cm}^3 \text{mol}^{-1}$  is given. The organic fraction  $w_{\text{org}}$  for each row can be found in Table 1. In some of the calculations with glutaric acid and propionic acid all curves overlap.

## S10 Influence of organic fraction on the critical activation diameter

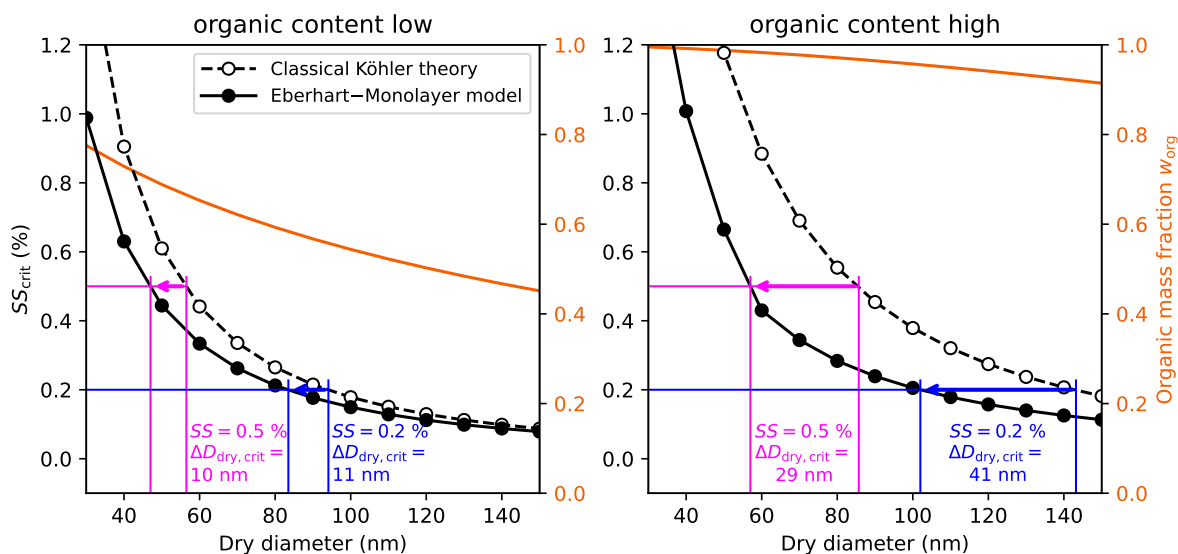

Figure S14: Same as Fig. 8 but with low organic content (left panel) and high organic content (right panel). The organic fraction is shown with an orange solid line on the right y-axis.

## References

- Ekström, S., Nozière, B., Hultberg, M., Alsberg, T., Magnér, J., Nilsson, E. D., and Artaxo, P.: A possible role of ground-based microorganisms on cloud formation in the atmosphere, *Biogeosciences*, 7, 387–394, <https://doi.org/10.5194/bg-7-387-2010>, 2010.
- El Haber, M., Gérard, V., Kleinheins, J., Ferronato, C., and Nozière, B.: Measuring the Surface Tension of Atmospheric Particles and Relevant Mixtures to Better Understand Key Atmospheric Processes, *Chem. Rev.*, <https://doi.org/10.1021/acs.chemrev.4c00173>, 2024.
- Gérard, V., Nozière, B., Baduel, C., Fine, L., Frossard, A. A., and Cohen, R. C.: Anionic, Cationic, and Nonionic Surfactants in Atmospheric Aerosols from the Baltic Coast at Askö, Sweden: Implications for Cloud Droplet Activation, *Environmental Science & Technology*, 50, 2974–2982, <https://doi.org/10.1021/acs.est.5b05809>, PMID: 26895279, 2016.
- Kleinheins, J., Shardt, N., El Haber, M., Ferronato, C., Nozière, B., Peter, T., and Marcolli, C.: Surface tension models for binary aqueous solutions: a review and intercomparison, *Phys. Chem. Chem. Phys.*, 25, 11 055–11 074, <https://doi.org/10.1039/D3CP00322A>, 2023.
